# Supplementary material for: Association of Elevated Expression Levels of COL4A1 in Stromal Cells with an Immunosuppressive Tumor Microenvironment in Low-Grade Glioma, Pancreatic Adenocarcinoma, Skin Cutaneous Melanoma, and Stomach Adenocarcinoma
Source: MDPI journal article supplement (doi:10.3390/jpm12040534), 2022-03-28
Supplement: s1 [file s1]

# Association of Elevated Expression Levels of *COL4A1* in Stromal Cells with Immunosuppressive Tumor Microenvironment in Low-Grade Glioma, Pancreatic Adenocarcinoma, Skin Cutaneous Melanoma, and Stomach Adenocarcinoma

Hyo Jae Shin <sup>1</sup>, Minchan Gil <sup>2,\*</sup> and Im-Soon Lee <sup>3,\*</sup>

<sup>1</sup> Department of Biological Sciences, Konkuk University, 120 Neungdong-ro, Gwangjin-gu, Seoul 05029, Republic of Korea; Shinhyojae0606@gmail.com.

<sup>2</sup> Department of Stem Cell and Regenerative Biotechnology, Konkuk University, 120 Neungdong-ro, Gwangjin-gu, Seoul 05029, Republic of Korea; e-mail@e-mail.com

<sup>3</sup> Department of Biological Sciences, Konkuk University, 120 Neungdong-ro, Gwangjin-gu, Seoul 05029, Republic of Korea; islee@konkuk.ac.kr.

\* Correspondence: islee@konkuk.ac.kr

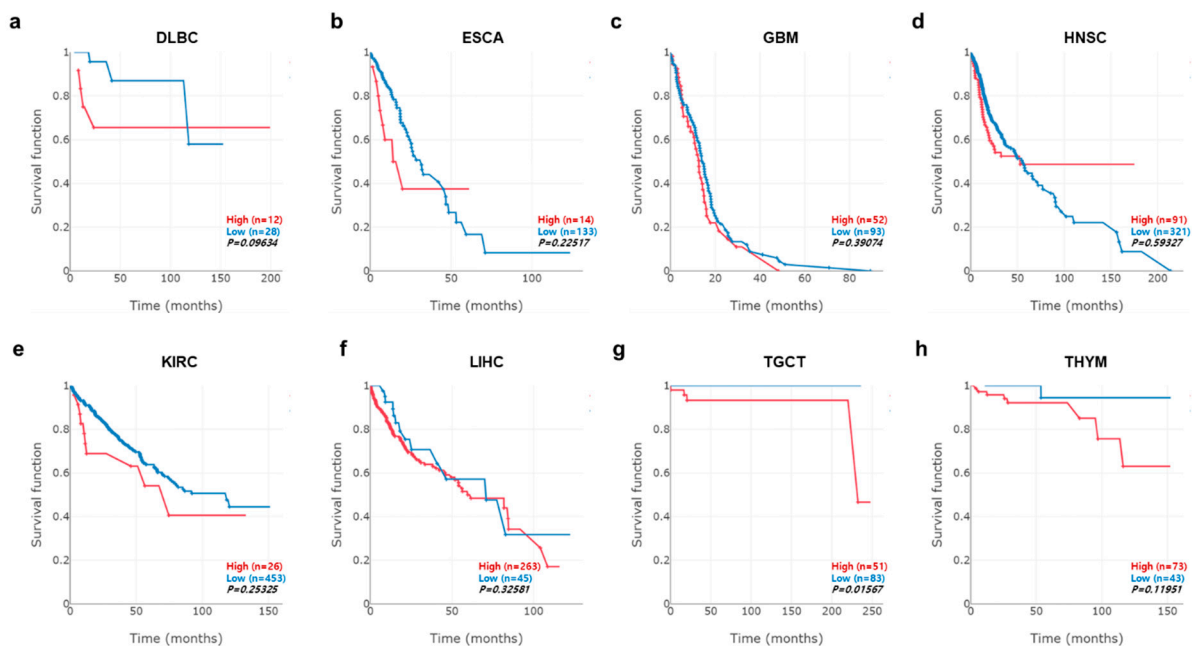

**Figure S1.** Overall patient survival according to the expression levels of collagen type IV alpha1 chain 1 (*COL4A1*) in diffuse large B-cell lymphoma (DLBC), esophageal carcinoma (ESCA), glioblastoma multiforme (GBM), head and neck squamous cell carcinoma (HNSC), kidney renal clear cell carcinoma (KIRC), liver hepatocellular carcinoma (LIHC), testicular germ cell tumors (TGCT), and thymoma (THYM). Kaplan-Meier survival curves of patient groups with high (red) and low (blue) *COL4A1* expression levels split by optimal cut-off to minimize the *p*-value were retrieved from The Cancer Genome Atlas (TCGA) datasets using the ESurv online analysis tool. (a) DLBC (n = 40), (b) ESCA (n = 147), (c) GBM (n = 145), and (d) HNSC (n = 412), (e) KIRC (n = 479), (f) LIHC (n = 308), (g) TGCA (n = 134), (h) THYM (n = 116).

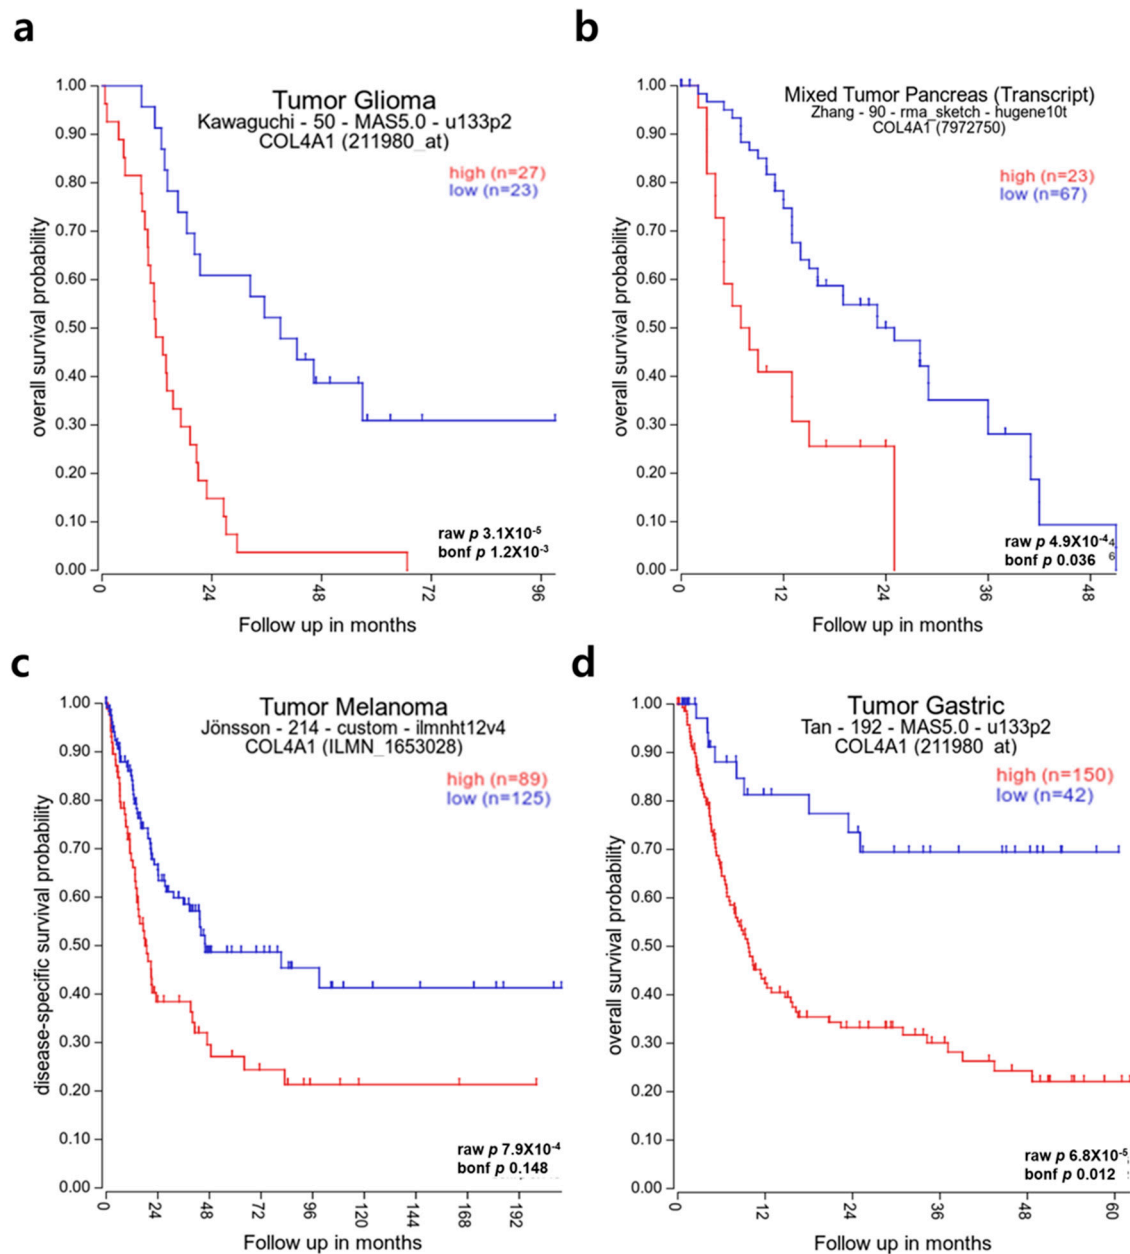

**Figure S2.** Kaplan–Meier survival curves of patient groups with high and low *COL4A1* expression levels retrieved from the R2 platform. Kaplan–Meier survival curves of the patient groups with high (red) or low (blue) *COL4A1* expression levels were retrieved from the R2 platform. Patients were divided into two groups based on *COL4A1* expression levels to maximize the survival difference. The analyzed datasets were as follows: (a) tumor glioma (GSE43378,  $n = 50$ ), (b) mixed tumor pancreas (GSE28735,  $n = 90$ ), (c) tumor melanoma (GSE65904,  $n = 214$ ), and (d) tumor gastric (GSE15459,  $n = 192$ ).

**a**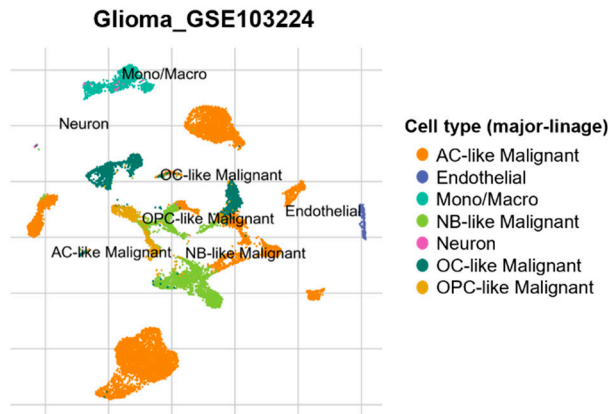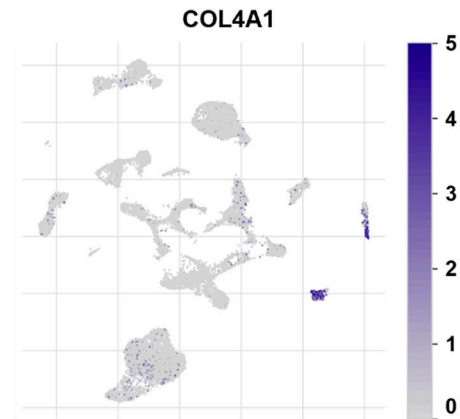**b**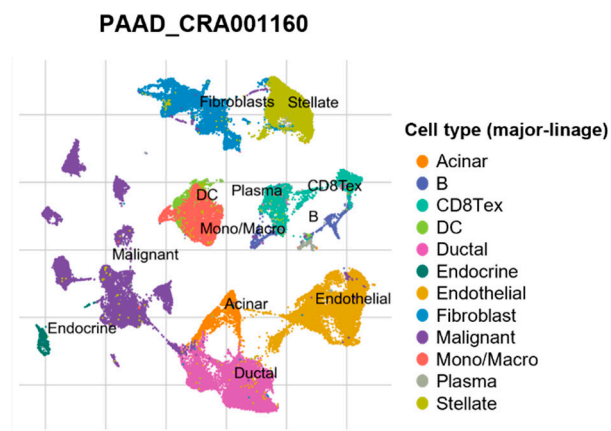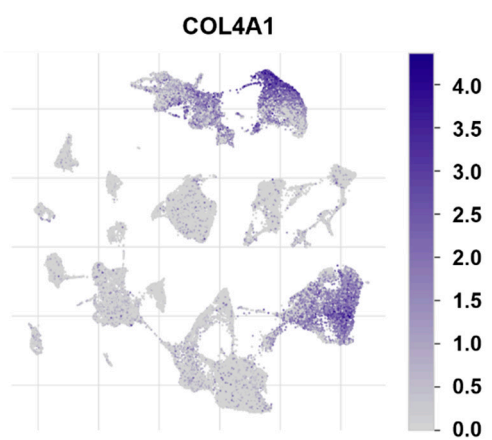**c**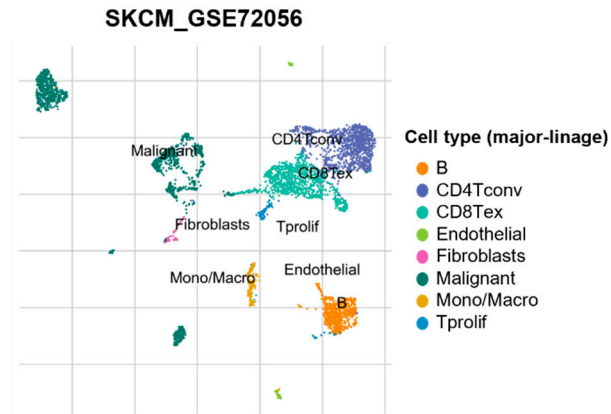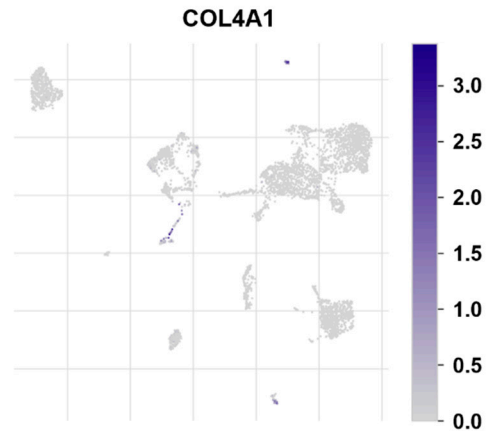**d**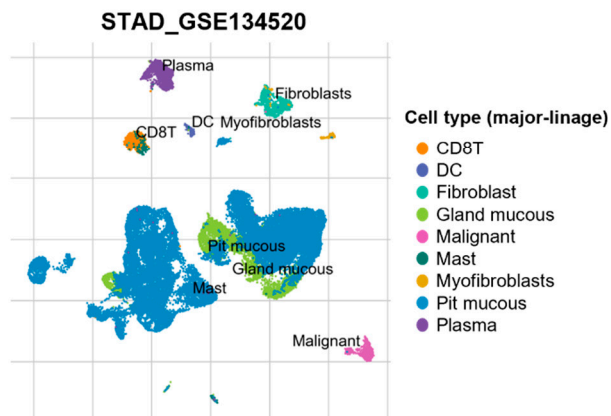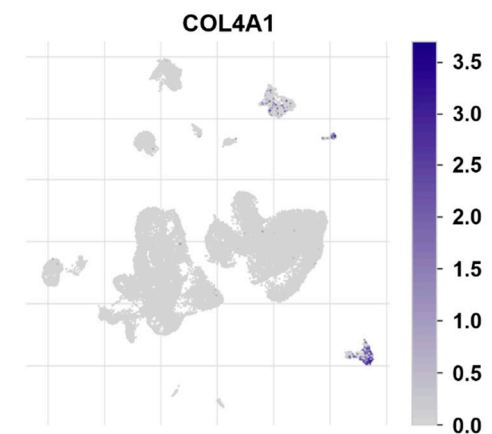

**Figure S3.** Single cell RNA-sequencing analysis of the *COL4A1* gene in TME cells of LGG, PAAD, SKCM, and STAD. Single cell RNA-sequencing plots of individual type of cancers with the expression of COL4A1 were retrieved from TISCH dataset browser. Analyzed cancer types were: (a) Glioma (GSE103224; 8 patients, 17185 cells), (b) PAAD (CRA001160; 35 patients, 57443 cells), (c) SKCM (GSE72056; 19 patients, 4645 cells), and (d) STAD (GSE134520; 13 patients, 41554 cells).

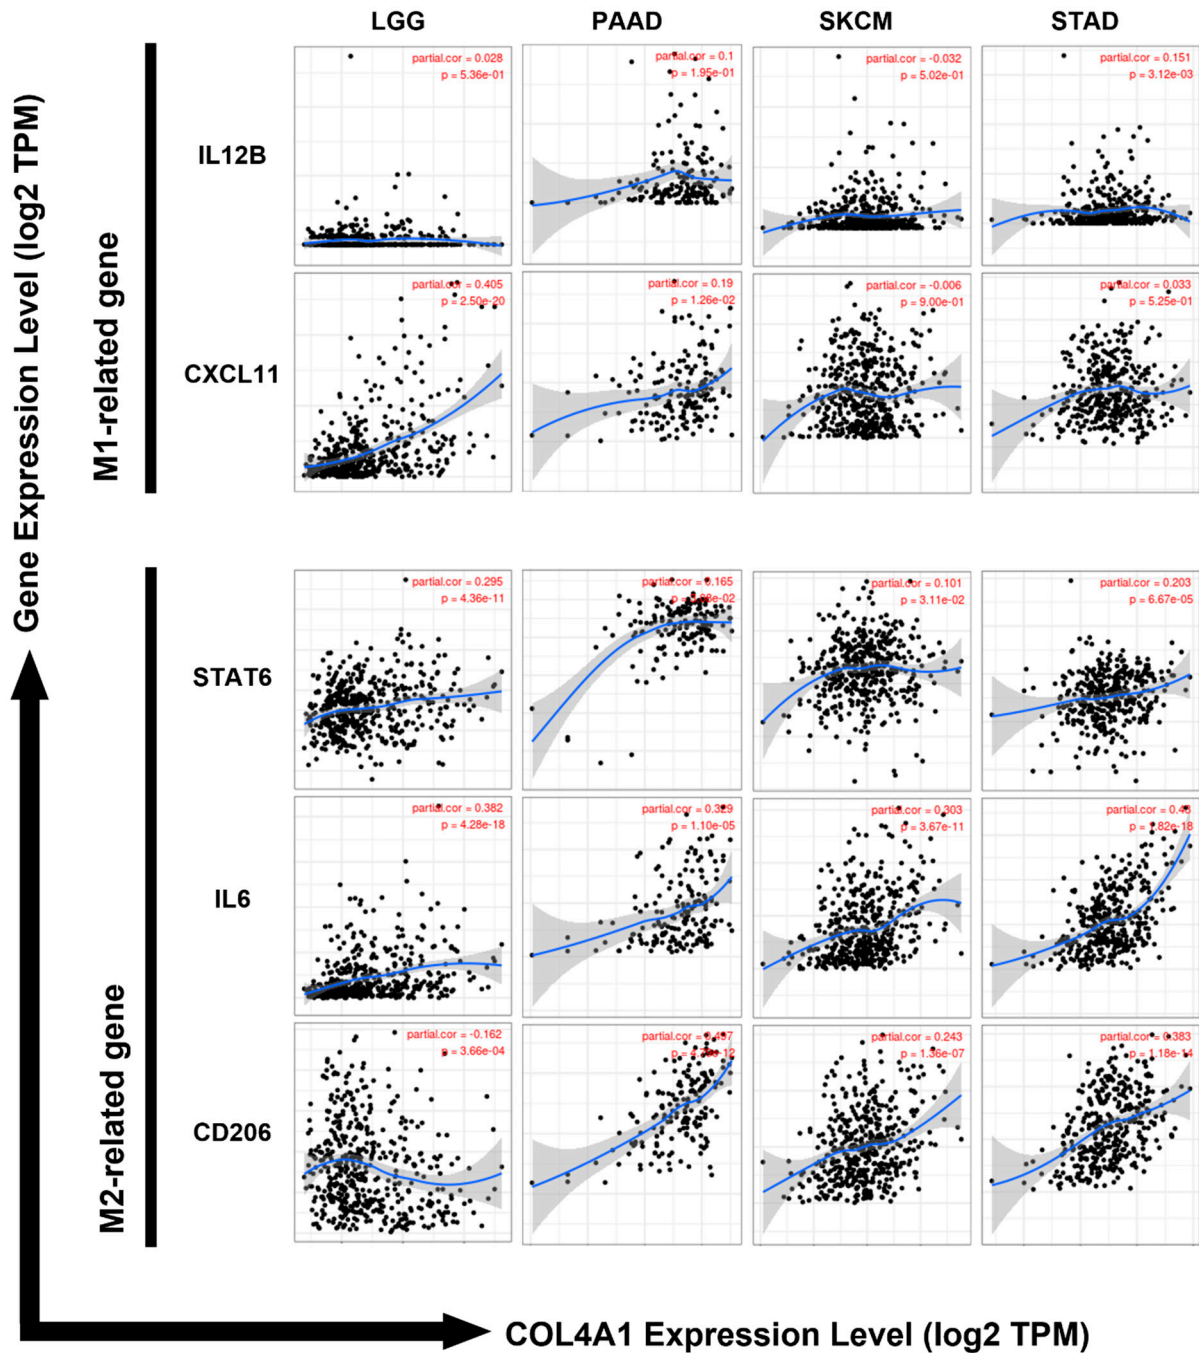

**Figure S4.** The correlation of *COL4A1* expression with the expression levels of various polarized macrophage-related genes in LGG, PAAD, SKCM, and STAD. Correlation analysis of individual type of cancers were retrieved from TIMER tool. Interleukin-12 subunit beta (*IL12B*) and C-X-C motif chemokine ligand 11 (*CXCL11*) were used as M1-related genes; Signal transducer and activator of transcription 6 (*STAT6*), interleukin-6 (*IL6*), and cluster of differentiation 206 (*CD206*) were used as M2-related genes.



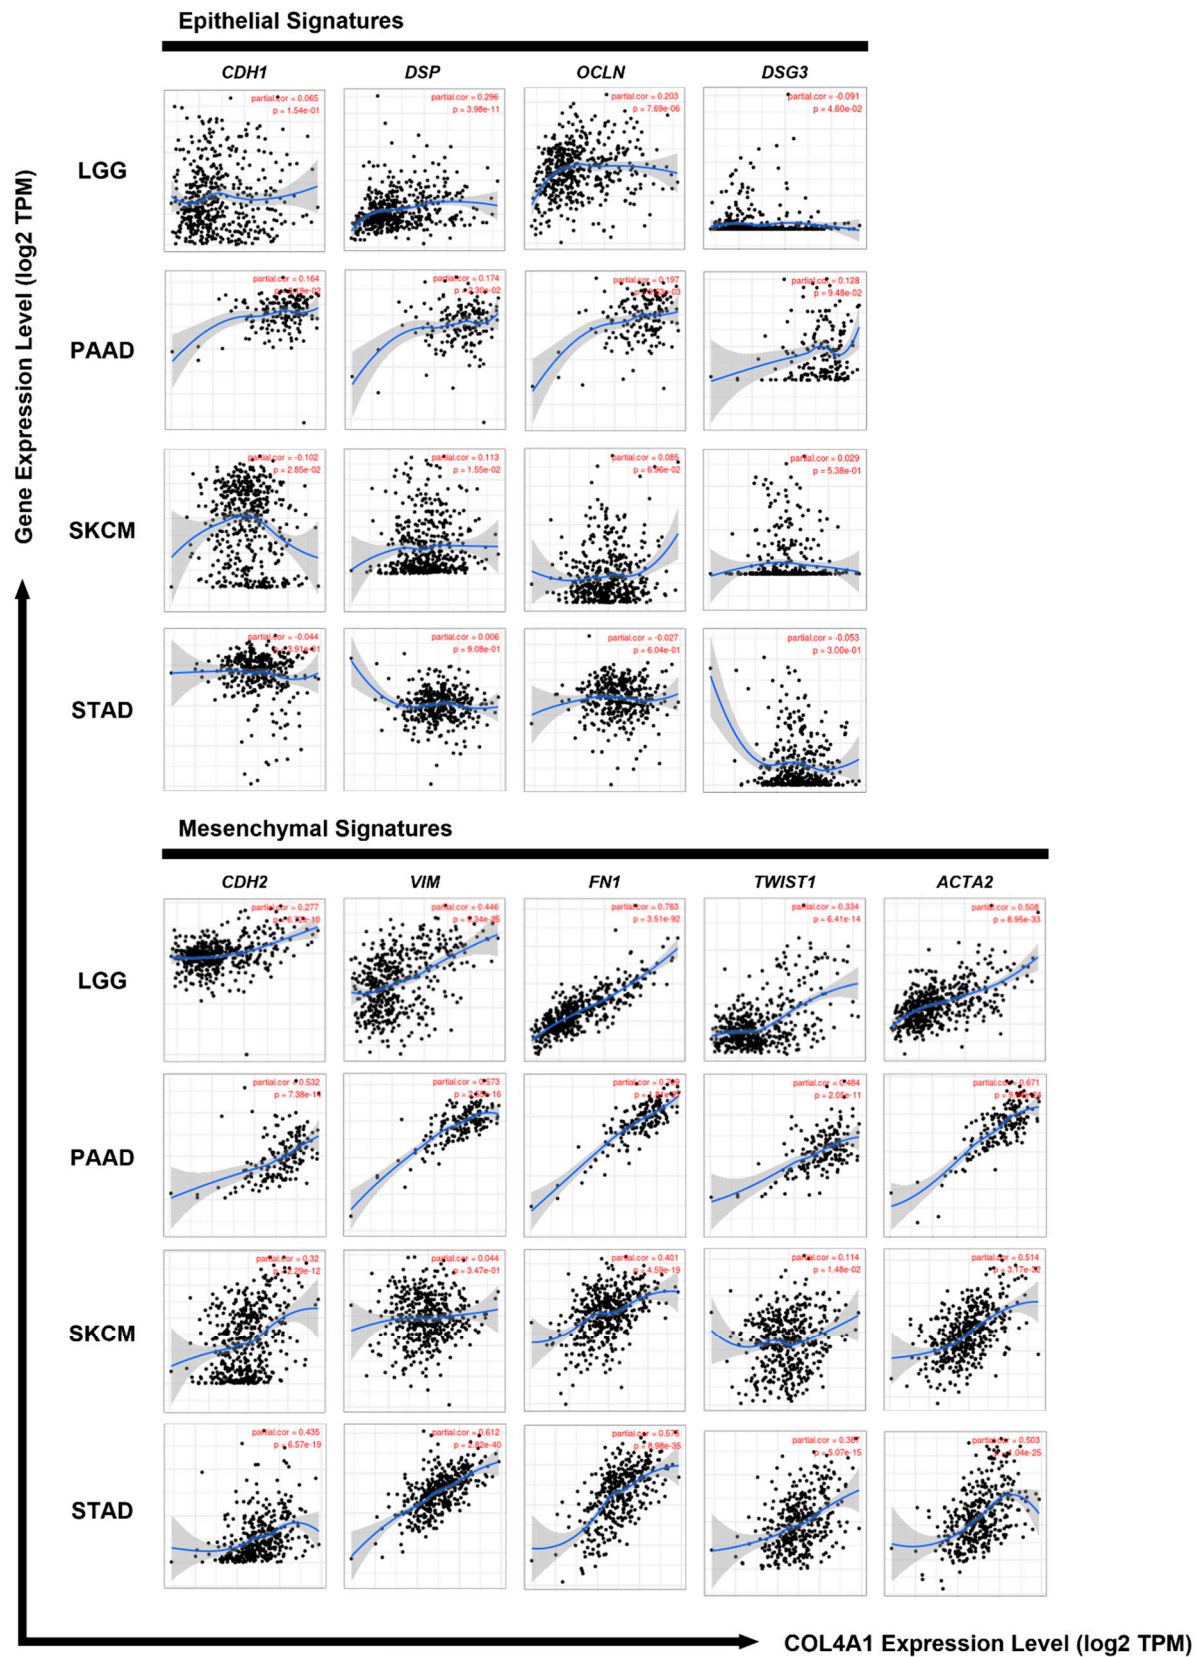

**Figure S5.** The correlation of *COL4A1* expression with the expression levels of various EMT signature genes in LGG, PAAD, SKCM, and STAD. Correlation analysis of individual type of cancers were retrieved from TIMER tool. Cadherin 1 (*CDH1*, E-cadherin), desmoplakin (*DSP*), occludin (*OCLN*),

and desmoglein 3 (*DSG3*) were used for epithelial signature genes; Cadherin 2 (*CDH2*, N-cadherin), vimentin (*VIM*), fibronectin 1 (*FN1*), twist family bHLH transcription factor (*TWIST1*), and alpha smooth muscle actin (*ACTA2*) were used for mesenchymal signatures.

**Table S1.** List of The Cancer Genome Atlas (TCGA) abbreviations for different types of cancer.

| Abbreviation | Name                                                             |
|--------------|------------------------------------------------------------------|
| ACC          | Adrenocortical carcinoma                                         |
| BLCA         | Bladder urothelial carcinoma                                     |
| BRCA         | Breast invasive carcinoma                                        |
| CESC         | Cervical squamous cell carcinoma and endocervical adenocarcinoma |
| CHOL         | Cholangiocarcinoma                                               |
| COAD         | Colon adenocarcinoma                                             |
| DLBC         | Lymphoid neoplasm diffuse large B-cell lymphoma                  |
| ESCA         | Esophageal carcinoma                                             |
| GBM          | Glioblastoma multiforme                                          |
| HNSC         | Head and neck squamous cell carcinoma                            |
| KICH         | Kidney chromophobe                                               |
| KIRC         | Kidney renal clear cell carcinoma                                |
| KIRP         | Kidney renal papillary cell carcinoma                            |
| LAML         | Acute myeloid leukemia                                           |
| LGG          | Low-grade glioma                                                 |
| LIHC         | Liver hepatocellular carcinoma                                   |
| LUAD         | Lung adenocarcinoma                                              |
| LUSC         | Lung squamous cell carcinoma                                     |
| MESO         | Mesothelioma                                                     |
| OV           | Ovarian serous cystadenocarcinoma                                |
| PAAD         | Pancreatic adenocarcinoma                                        |
| PCPG         | Pheochromocytoma and Paraganglioma                               |
| PRAD         | Prostate adenocarcinoma                                          |
| READ         | Rectum adenocarcinoma                                            |
| SARC         | Sarcoma                                                          |
| SKCM         | Skin cutaneous melanoma                                          |
| STAD         | Stomach adenocarcinoma                                           |
| TGCT         | Testicular germ cell tumors                                      |
| THCA         | Thyroid carcinoma                                                |
| THYM         | Thymoma                                                          |
| UCEC         | Uterine corpus endometrial carcinoma                             |
| UCS          | Uterine carcinosarcoma                                           |
| UVM          | Uveal melanoma                                                   |



**Table S2.** Correlation analyses among the expression levels of collagen type IV alpha chain 1 (*COL4A1*) and related marker genes of T, B, monocytes, natural killer (NK), dendritic, Th2, Tfh, Th17, and exhausted T cells in low-grade glioma (LGG), pancreatic adenocarcinoma (PAAD), skin cutaneous melanoma (SKCM), and stomach adenocarcinoma (STAD)-TCGA datasets using the Tumor Immune Estimation Resource (TIMER) web tool.

| Description       | Gene Markers    | LGG    |       |        |       | PAAD   |       |        |       | SKCM   |       |        |       | STAD   |       |        |       |
|-------------------|-----------------|--------|-------|--------|-------|--------|-------|--------|-------|--------|-------|--------|-------|--------|-------|--------|-------|
|                   |                 | None   |       | Purity |       | None   |       | Purity |       | None   |       | Purity |       | None   |       | Purity |       |
|                   |                 | Cor    | P     |
| T cells (general) | <i>CD3D</i>     | 0.382  | ***   | 0.427  | ***   | 0.322  | ***   | 0.253  | ***   | -0.006 | 0.901 | -0.118 | *     | 0.093  | 0.059 | 0.069  | 0.182 |
|                   | <i>CD3E</i>     | 0.403  | ***   | 0.438  | ***   | 0.358  | ***   | 0.29   | ***   | 0.009  | 0.842 | -0.095 | *     | 0.127  | **    | 0.109  | *     |
|                   | <i>CD2</i>      | 0.448  | ***   | 0.477  | ***   | 0.367  | ***   | 0.292  | ***   | 0.021  | 0.654 | -0.078 | 0.097 | 0.141  | **    | 0.125  | *     |
| B cells           | <i>CD19</i>     | 0.365  | ***   | 0.36   | ***   | 0.232  | **    | 0.179  | *     | 0.005  | 0.907 | -0.059 | 0.207 | 0.147  | **    | 0.134  | **    |
|                   | <i>CD79A</i>    | 0.2    | ***   | 0.208  | ***   | 0.275  | ***   | 0.213  | **    | -0.05  | 0.28  | -0.133 | **    | 0.108  | *     | 0.077  | 0.135 |
| Monocytes         | <i>CD86</i>     | 0.262  | ***   | 0.303  | ***   | 0.611  | ***   | 0.562  | ***   | 0.218  | ***   | 0.188  | ***   | 0.284  | ***   | 0.271  | ***   |
|                   | <i>CSF1R</i>    | 0.111  | *     | 0.141  | **    | 0.581  | ***   | 0.524  | ***   | 0.317  | ***   | 0.308  | ***   | 0.418  | ***   | 0.399  | ***   |
| NK cells          | <i>KIR2DL1</i>  | 0.203  | ***   | 0.204  | ***   | 0.22   | **    | 0.219  | **    | 0.003  | 0.949 | -0.049 | 0.299 | 0.119  | *     | 0.118  | *     |
|                   | <i>KIR2DL3</i>  | 0.274  | ***   | 0.288  | ***   | 0.279  | ***   | 0.291  | ***   | 0.037  | 0.42  | -0.029 | 0.542 | 0.081  | 0.099 | 0.07   | 0.174 |
|                   | <i>KIR2DL4</i>  | 0.249  | ***   | 0.243  | ***   | 0.15   | *     | 0.164  | *     | -0.045 | 0.332 | -0.127 | **    | -0.061 | 0.214 | -0.087 | 0.089 |
|                   | <i>KIR3DL1</i>  | 0.168  | ***   | 0.171  | ***   | 0.204  | **    | 0.187  | *     | 0.042  | 0.367 | -0.015 | 0.751 | 0.085  | 0.085 | 0.06   | 0.242 |
|                   | <i>KIR3DL2</i>  | 0.178  | ***   | 0.19   | ***   | 0.223  | **    | 0.174  | *     | 0.045  | 0.329 | -0.029 | 0.533 | 0.122  | *     | 0.128  | *     |
|                   | <i>KIR3DL3</i>  | 0.013  | 0.771 | 0.017  | 0.707 | 0.194  | **    | 0.144  | 0.06  | -0.061 | 0.183 | -0.087 | 0.062 | -0.029 | 0.555 | -0.008 | 0.878 |
|                   | <i>KIR2DS4</i>  | 0.188  | ***   | 0.213  | ***   | 0.047  | 0.531 | 0.053  | 0.487 | 0.055  | 0.23  | 0.005  | 0.914 | 0.102  | *     | 0.099  | 0.055 |
|                   | <i>KLRK1</i>    | -0.083 | 0.059 | -0.106 | *     | 0.22   | **    | 0.182  | *     | -0.001 | 0.988 | -0.074 | 0.116 | 0.112  | *     | 0.089  | 0.085 |
|                   | <i>NCR1</i>     | 0.24   | ***   | 0.228  | ***   | 0.364  | ***   | 0.405  | ***   | 0.147  | **    | 0.105  | *     | 0.161  | **    | 0.16   | **    |
|                   | <i>NCR2</i>     | 0.05   | 0.254 | 0.045  | 0.325 | -0.098 | 0.193 | -0.091 | 0.237 | 0.048  | 0.296 | 0.025  | 0.593 | -0.089 | 0.07  | -0.1   | 0.053 |
|                   | <i>NCR3</i>     | 0.07   | 0.113 | 0.084  | 0.065 | 0.173  | *     | 0.129  | 0.094 | 0.092  | *     | 0.023  | 0.621 | 0.106  | *     | 0.098  | 0.056 |
| Dendritic cells   | <i>HLA-DPB1</i> | 0.444  | ***   | 0.472  | ***   | 0.471  | ***   | 0.412  | ***   | 0.112  | *     | 0.052  | 0.27  | 0.135  | **    | 0.117  | *     |
|                   | <i>HLA-DQB1</i> | 0.392  | ***   | 0.415  | ***   | 0.392  | ***   | 0.335  | ***   | 0.101  | *     | 0.046  | 0.329 | 0.1    | *     | 0.079  | 0.124 |

|                   |                 |        |       |        |       |       |       |       |       |        |       |        |       |       |       |       |       |
|-------------------|-----------------|--------|-------|--------|-------|-------|-------|-------|-------|--------|-------|--------|-------|-------|-------|-------|-------|
|                   | <i>HLA-DRA</i>  | 0.465  | ***   | 0.491  | ***   | 0.549 | ***   | 0.498 | ***   | 0.114  | *     | 0.056  | 0.229 | 0.1   | *     | 0.088 | 0.088 |
|                   | <i>HLA-DPA1</i> | 0.478  | ***   | 0.508  | ***   | 0.548 | ***   | 0.503 | ***   | 0.079  | 0.087 | 0.014  | 0.768 | 0.094 | 0.056 | 0.078 | 0.131 |
|                   | <i>CD1C</i>     | 0.278  | ***   | 0.271  | ***   | 0.283 | ***   | 0.227 | **    | 0.127  | **    | 0.083  | 0.076 | 0.186 | ***   | 0.169 | ***   |
|                   | <i>NRP1</i>     | 0.616  | ***   | 0.604  | ***   | 0.741 | ***   | 0.716 | ***   | 0.67   | ***   | 0.665  | ***   | 0.662 | ***   | 0.638 | ***   |
|                   | <i>ITGAX</i>    | 0.219  | ***   | 0.262  | ***   | 0.497 | ***   | 0.434 | ***   | 0.175  | ***   | 0.128  | **    | 0.395 | ***   | 0.381 | ***   |
| Th2               | <i>GATA3</i>    | 0.379  | ***   | 0.411  | ***   | 0.264 | ***   | 0.238 | **    | 0.13   | **    | 0.065  | 0.168 | 0.156 | **    | 0.143 | **    |
|                   | <i>STAT6</i>    | 0.185  | ***   | 0.295  | ***   | 0.183 | *     | 0.165 | *     | 0.095  | *     | 0.101  | *     | 0.206 | ***   | 0.203 | ***   |
|                   | <i>STAT5A</i>   | 0.28   | ***   | 0.32   | ***   | 0.361 | ***   | 0.313 | ***   | -0.104 | *     | -0.109 | *     | 0.312 | ***   | 0.299 | ***   |
|                   | <i>IL13</i>     | -0.022 | 0.62  | -0.008 | 0.855 | 0.04  | 0.595 | 0.049 | 0.525 | 0.02   | 0.658 | 0.002  | 0.965 | 0.123 | *     | 0.148 | **    |
| Tfh               | <i>BCL6</i>     | 0.084  | 0.058 | 0.052  | 0.252 | 0.417 | ***   | 0.389 | ***   | 0.136  | **    | 0.119  | *     | 0.389 | ***   | 0.351 | ***   |
|                   | <i>IL21</i>     | 0.098  | *     | 0.082  | 0.073 | 0.156 | *     | 0.134 | 0.081 | 0.044  | 0.336 | 0.003  | 0.943 | 0.009 | 0.858 | 0.003 | 0.956 |
| Th17              | <i>STAT3</i>    | 0.569  | ***   | 0.555  | ***   | 0.619 | ***   | 0.589 | ***   | 0.26   | ***   | 0.246  | ***   | 0.459 | ***   | 0.435 | ***   |
|                   | <i>IL17A</i>    | 0.07   | 0.114 | 0.055  | 0.226 | 0.097 | 0.197 | 0.074 | 0.335 | -0.035 | 0.445 | -0.045 | 0.342 | 0.032 | 0.518 | 0.035 | 0.494 |
| Exhausted T cells | <i>PDCD1</i>    | 0.409  | ***   | 0.42   | ***   | 0.283 | ***   | 0.209 | **    | -0.032 | 0.484 | -0.133 | **    | 0.13  | **    | 0.127 | *     |
|                   | <i>CTLA4</i>    | 0.264  | ***   | 0.264  | ***   | 0.356 | ***   | 0.29  | ***   | 0.081  | 0.078 | 0.026  | 0.581 | 0.182 | ***   | 0.177 | ***   |
|                   | <i>LAG3</i>     | 0.248  | ***   | 0.247  | ***   | 0.219 | **    | 0.185 | *     | -0.03  | 0.518 | -0.122 | **    | 0.1   | *     | 0.078 | 0.129 |
|                   | <i>HAVCR2</i>   | 0.295  | ***   | 0.347  | ***   | 0.618 | ***   | 0.568 | ***   | 0.211  | ***   | 0.179  | ***   | 0.3   | ***   | 0.284 | ***   |

Asterisks denote the significance level of the correlation between the expression levels of *COL4A1* and each marker gene (\*  $P < 0.05$ , \*\*  $P < 0.01$ , \*\*\*  $P < 0.001$ ).

**Table S3.** Correlation analyses among the expression levels of *COL4A1* and related marker genes of the tumor microenvironment (TME) immune cells of four tumor groups from different origins using the R2 tool.

| Description       | Gene Markers   | Tumor Glioma<br>(GSE43378, n = 50) |                                          | Mixed Tumor Pancreas<br>(GSE28735, n = 90) |                                          | Tumor Melanoma<br>(GSE65904, n = 214) |                                          | Tumor Gastric<br>(GSE15459, n = 192) |                                          |
|-------------------|----------------|------------------------------------|------------------------------------------|--------------------------------------------|------------------------------------------|---------------------------------------|------------------------------------------|--------------------------------------|------------------------------------------|
|                   |                | r-value                            | p-value                                  | r-value                                    | p-value                                  | r-value                               | p-value                                  | r-value                              | p-value                                  |
| CD8+ T cell       | <i>CD8A</i>    | 0.075                              | $6.04 \times 10^{-1}$                    | -0.103                                     | $3.36 \times 10^{-1}$                    | -0.077                                | $2.65 \times 10^{-1}$                    | -0.133                               | $6.60 \times 10^{-2}$                    |
|                   | <i>CD8B</i>    | -0.082                             | $5.69 \times 10^{-1}$                    | 0.116                                      | $2.74 \times 10^{-1}$                    | -0.143                                | <b><math>3.70 \times 10^{-2}</math></b>  | -0.123                               | $9.00 \times 10^{-2}$                    |
| T cells (general) | <i>CD3D</i>    | 0.290                              | <b><math>4.10 \times 10^{-2}</math></b>  | 0.320                                      | <b><math>2.08 \times 10^{-3}</math></b>  | -0.004                                | $9.59 \times 10^{-1}$                    | -0.077                               | $2.89 \times 10^{-1}$                    |
|                   | <i>CD3E</i>    | -0.111                             | $4.43 \times 10^{-1}$                    | 0.251                                      | <b><math>1.70 \times 10^{-2}</math></b>  | 0.049                                 | $4.75 \times 10^{-1}$                    | 0.010                                | $8.86 \times 10^{-1}$                    |
|                   | <i>CD2</i>     | 0.329                              | <b><math>2.00 \times 10^{-2}</math></b>  | 0.353                                      | <b><math>6.41 \times 10^{-4}</math></b>  | 0.003                                 | $9.67 \times 10^{-1}$                    | -0.028                               | $6.97 \times 10^{-1}$                    |
| B cells           | <i>CD19</i>    | -0.218                             | $1.28 \times 10^{-1}$                    | -0.284                                     | <b><math>6.64 \times 10^{-3}</math></b>  | -0.014                                | $8.39 \times 10^{-1}$                    | -0.168                               | <b><math>2.00 \times 10^{-2}</math></b>  |
|                   | <i>CD79A</i>   | -0.145                             | $3.14 \times 10^{-1}$                    | 0.099                                      | $3.53 \times 10^{-1}$                    | 0.010                                 | $8.79 \times 10^{-1}$                    | -0.145                               | <b><math>4.40 \times 10^{-2}</math></b>  |
| Monocytes         | <i>CD86</i>    | 0.412                              | <b><math>2.97 \times 10^{-3}</math></b>  | 0.674                                      | <b><math>3.49 \times 10^{-13}</math></b> | 0.162                                 | <b><math>1.80 \times 10^{-2}</math></b>  | 0.205                                | <b><math>4.43 \times 10^{-3}</math></b>  |
|                   | <i>CSF1R</i>   | 0.111                              | $4.42 \times 10^{-1}$                    | 0.686                                      | <b><math>8.11 \times 10^{-14}</math></b> | 0.478                                 | <b><math>1.33 \times 10^{-13}</math></b> | 0.419                                | <b><math>1.41 \times 10^{-9}</math></b>  |
| TAMs              | <i>CCL2</i>    | 0.233                              | $1.03 \times 10^{-1}$                    | 0.254                                      | <b><math>1.60 \times 10^{-2}</math></b>  | 0.355                                 | <b><math>9.09 \times 10^{-8}</math></b>  | 0.452                                | <b><math>4.78 \times 10^{-11}</math></b> |
|                   | <i>CD68</i>    | N/A                                | N/A                                      | N/A                                        | N/A                                      | 0.208                                 | <b><math>2.20 \times 10^{-3}</math></b>  | N/A                                  | N/A                                      |
|                   | <i>IL10</i>    | 0.305                              | <b><math>3.10 \times 10^{-2}</math></b>  | 0.219                                      | <b><math>3.80 \times 10^{-2}</math></b>  | 0.201                                 | <b><math>3.09 \times 10^{-3}</math></b>  | 0.107                                | $1.38 \times 10^{-1}$                    |
| M1 macrophages    | <i>NOS2</i>    | 0.090                              | $5.33 \times 10^{-1}$                    | -0.327                                     | <b><math>1.69 \times 10^{-3}</math></b>  | 0.118                                 | $8.50 \times 10^{-2}$                    | -0.190                               | <b><math>8.16 \times 10^{-3}</math></b>  |
|                   | <i>IRF5</i>    | 0.034                              | $8.12 \times 10^{-1}$                    | 0.207                                      | $5.00 \times 10^{-2}$                    | -0.026                                | $7.03 \times 10^{-1}$                    | -0.051                               | $4.85 \times 10^{-1}$                    |
|                   | <i>PTGS2</i>   | 0.328                              | <b><math>2.00 \times 10^{-2}</math></b>  | 0.584                                      | <b><math>1.55 \times 10^{-9}</math></b>  | 0.362                                 | <b><math>5.17 \times 10^{-8}</math></b>  | 0.461                                | <b><math>1.75 \times 10^{-11}</math></b> |
| M2 macrophages    | <i>CD163</i>   | 0.777                              | <b><math>3.16 \times 10^{-11}</math></b> | 0.684                                      | <b><math>1.06 \times 10^{-13}</math></b> | 0.375                                 | <b><math>1.50 \times 10^{-8}</math></b>  | 0.369                                | <b><math>1.43 \times 10^{-7}</math></b>  |
|                   | <i>VSIG4</i>   | 0.413                              | <b><math>2.88 \times 10^{-3}</math></b>  | 0.624                                      | <b><math>5.10 \times 10^{-11}</math></b> | 0.326                                 | <b><math>1.05 \times 10^{-6}</math></b>  | 0.307                                | <b><math>1.45 \times 10^{-5}</math></b>  |
|                   | <i>MS4A4A</i>  | 0.558                              | <b><math>2.52 \times 10^{-5}</math></b>  | 0.521                                      | <b><math>1.41 \times 10^{-7}</math></b>  | 0.279                                 | <b><math>3.46 \times 10^{-5}</math></b>  | 0.290                                | <b><math>4.45 \times 10^{-5}</math></b>  |
| Neutrophils       | <i>CEACAM8</i> | 0.334                              | <b><math>1.80 \times 10^{-2}</math></b>  | 0.248                                      | <b><math>1.80 \times 10^{-2}</math></b>  | -0.015                                | $8.26 \times 10^{-1}$                    | 0.004                                | $9.53 \times 10^{-1}$                    |
|                   | <i>ITGAM</i>   | 0.134                              | $3.55 \times 10^{-1}$                    | 0.768                                      | <b><math>1.09 \times 10^{-18}</math></b> | 0.344                                 | <b><math>2.42 \times 10^{-7}</math></b>  | 0.278                                | <b><math>9.33 \times 10^{-5}</math></b>  |

|                 |                 |        |                             |        |                              |        |                              |        |                              |
|-----------------|-----------------|--------|-----------------------------|--------|------------------------------|--------|------------------------------|--------|------------------------------|
|                 | <i>CCR7</i>     | 0.478  | <b>4.50×10<sup>-4</sup></b> | 0.370  | <b>3.32×10<sup>-4</sup></b>  | 0.108  | 1.14×10 <sup>-1</sup>        | 0.003  | 9.67×10 <sup>-1</sup>        |
|                 | <i>KIR2DL1</i>  | 0.032  | 8.27×10 <sup>-1</sup>       | N/A    | N/A                          | -0.067 | 3.33×10 <sup>-1</sup>        | 0.001  | 9.85×10 <sup>-1</sup>        |
|                 | <i>KIR2DL3</i>  | -0.370 | <b>8.23×10<sup>-3</sup></b> | N/A    | N/A                          | -0.143 | 3.70×10 <sup>-2</sup>        | -0.153 | <b>3.40×10<sup>-2</sup></b>  |
|                 | <i>KIR2DL4</i>  | -0.135 | 3.52×10 <sup>-1</sup>       | N/A    | N/A                          | -0.174 | <b>1.10×10<sup>-2</sup></b>  | -0.011 | 8.76×10 <sup>-1</sup>        |
|                 | <i>KIR3DL1</i>  | -0.156 | 2.81×10 <sup>-1</sup>       | N/A    | N/A                          | -0.052 | 4.53×10 <sup>-1</sup>        | -0.046 | 5.26×10 <sup>-1</sup>        |
|                 | <i>KIR3DL2</i>  | N/A    | N/A                         | N/A    | N/A                          | -0.063 | 3.61×10 <sup>-1</sup>        | N/A    | N/A                          |
| NK cells        | <i>KIR3DL3</i>  | 0.034  | 8.15×10 <sup>-1</sup>       | N/A    | N/A                          | -0.078 | 2.55×10 <sup>-1</sup>        | -0.029 | 6.94×10 <sup>-1</sup>        |
|                 | <i>KIR2DS4</i>  | 0.132  | 3.59×10 <sup>-1</sup>       | N/A    | N/A                          | -0.126 | 6.50×10 <sup>-2</sup>        | -0.184 | <b>1.10×10<sup>-2</sup></b>  |
|                 | <i>KLRK1</i>    | N/A    | N/A                         | -0.019 | 8.58×10 <sup>-1</sup>        | -0.060 | 3.81×10 <sup>-1</sup>        | N/A    | N/A                          |
|                 | <i>NCR1</i>     | 0.002  | 9.90×10 <sup>-1</sup>       | -0.203 | 5.60×10 <sup>-2</sup>        | -0.074 | 2.84×10 <sup>-1</sup>        | -0.105 | 1.49×10 <sup>-1</sup>        |
|                 | <i>NCR2</i>     | -0.390 | <b>5.16×10<sup>-3</sup></b> | -0.616 | <b>1.02×10<sup>-10</sup></b> | -0.090 | 1.91×10 <sup>-1</sup>        | -0.058 | 4.27×10 <sup>-1</sup>        |
|                 | <i>NCR3</i>     | 0.078  | 5.90×10 <sup>-1</sup>       | -0.389 | <b>1.50×10<sup>-4</sup></b>  | 0.018  | 7.91×10 <sup>-1</sup>        | -0.076 | 2.95×10 <sup>-1</sup>        |
|                 | <i>HLA-DPB1</i> | 0.537  | <b>5.74×10<sup>-5</sup></b> | 0.572  | <b>3.96×10<sup>-9</sup></b>  | 0.084  | 2.21×10 <sup>-1</sup>        | 0.023  | 7.55×10 <sup>-1</sup>        |
|                 | <i>HLA-DQB1</i> | 0.513  | <b>1.39×10<sup>-4</sup></b> | 0.612  | <b>1.43×10<sup>-10</sup></b> | 0.048  | 4.86×10 <sup>-1</sup>        | -0.041 | 5.72×10 <sup>-1</sup>        |
|                 | <i>HLA-DRA</i>  | 0.548  | <b>3.83×10<sup>-5</sup></b> | 0.659  | <b>1.73×10<sup>-12</sup></b> | 0.197  | <b>3.74×10<sup>-3</sup></b>  | -0.121 | 9.40×10 <sup>-2</sup>        |
| Dendritic cells | <i>HLA-DPA1</i> | 0.457  | <b>8.59×10<sup>-4</sup></b> | 0.615  | <b>1.18×10<sup>-10</sup></b> | 0.124  | 7.00×10 <sup>-2</sup>        | -0.023 | 7.52×10 <sup>-1</sup>        |
|                 | <i>CD1C</i>     | 0.047  | 7.45×10 <sup>-1</sup>       | 0.445  | <b>1.11×10<sup>-5</sup></b>  | 0.204  | <b>2.67×10<sup>-3</sup></b>  | 0.097  | 1.80×10 <sup>-1</sup>        |
|                 | <i>NRP1</i>     | 0.722  | <b>3.25×10<sup>-9</sup></b> | 0.760  | <b>3.49×10<sup>-18</sup></b> | 0.704  | <b>2.62×10<sup>-33</sup></b> | 0.577  | <b>1.82×10<sup>-18</sup></b> |
|                 | <i>ITGAX</i>    | 0.315  | <b>2.60×10<sup>-2</sup></b> | 0.698  | <b>2.11×10<sup>-14</sup></b> | 0.096  | 1.62×10 <sup>-1</sup>        | 0.331  | <b>2.75×10<sup>-6</sup></b>  |
|                 | <i>TBX21</i>    | 0.323  | <b>2.20×10<sup>-2</sup></b> | -0.487 | <b>1.16×10<sup>-6</sup></b>  | -0.240 | <b>3.91×10<sup>-4</sup></b>  | -0.066 | 3.64×10 <sup>-1</sup>        |
|                 | <i>STAT4</i>    | -0.542 | <b>4.72×10<sup>-5</sup></b> | 0.294  | <b>4.89×10<sup>-3</sup></b>  | 0.081  | 2.38×10 <sup>-1</sup>        | 0.069  | 3.42×10 <sup>-1</sup>        |
| Th1             | <i>STAT1</i>    | 0.478  | <b>4.43×10<sup>-4</sup></b> | 0.294  | <b>4.89×10<sup>-3</sup></b>  | -0.167 | <b>1.40×10<sup>-2</sup></b>  | -0.218 | <b>2.38×10<sup>-3</sup></b>  |
|                 | <i>IFNG</i>     | 0.338  | <b>1.60×10<sup>-2</sup></b> | 0.095  | 3.71×10 <sup>-1</sup>        | -0.184 | <b>6.87×10<sup>-3</sup></b>  | -0.086 | 2.35×10 <sup>-1</sup>        |
|                 | <i>TNF</i>      | -0.352 | <b>1.20×10<sup>-2</sup></b> | -0.205 | <b>5.30×10<sup>-2</sup></b>  | 0.048  | 4.82×10 <sup>-1</sup>        | 0.043  | 5.57×10 <sup>-1</sup>        |
|                 | <i>GATA3</i>    | 0.385  | <b>5.79×10<sup>-3</sup></b> | 0.426  | <b>2.83×10<sup>-5</sup></b>  | -0.013 | 8.54×10 <sup>-1</sup>        | 0.034  | 6.36×10 <sup>-1</sup>        |
| Th2             | <i>STAT6</i>    | 0.103  | 4.78×10 <sup>-1</sup>       | 0.698  | <b>1.96×10<sup>-14</sup></b> | -0.012 | 8.59×10 <sup>-1</sup>        | 0.156  | <b>3.10×10<sup>-2</sup></b>  |

|                   |               |        |                             |        |                              |        |                              |        |                              |
|-------------------|---------------|--------|-----------------------------|--------|------------------------------|--------|------------------------------|--------|------------------------------|
| Tfh               | <i>STAT5A</i> | 0.121  | 4.03×10 <sup>-1</sup>       | 0.619  | <b>8.00×10<sup>-11</sup></b> | 0.064  | 3.54×10 <sup>-1</sup>        | 0.184  | <b>1.10×10<sup>-2</sup></b>  |
|                   | <i>IL13</i>   | 0.072  | 6.20×10 <sup>-1</sup>       | -0.207 | 5.00×10 <sup>-2</sup>        | -0.065 | 3.41×10 <sup>-1</sup>        | -0.123 | 9.00×10 <sup>-2</sup>        |
|                   | <i>BCL6</i>   | 0.375  | <b>7.27×10<sup>-3</sup></b> | 0.629  | <b>3.04×10<sup>-11</sup></b> | 0.433  | <b>3.48×10<sup>-11</sup></b> | 0.412  | <b>2.77×10<sup>-9</sup></b>  |
|                   | <i>IL21</i>   | 0.065  | 6.52×10 <sup>-1</sup>       | -0.316 | <b>2.41×10<sup>-3</sup></b>  | -0.075 | 2.73×10 <sup>-1</sup>        | -0.099 | 1.74×10 <sup>-1</sup>        |
| Th17              | <i>STAT3</i>  | 0.548  | <b>3.82×10<sup>-5</sup></b> | 0.785  | <b>5.09×10<sup>-20</sup></b> | 0.509  | <b>1.73×10<sup>-15</sup></b> | 0.266  | 1.89×10 <sup>-4</sup>        |
|                   | <i>IL17A</i>  | -0.075 | 6.05×10 <sup>-1</sup>       | -0.343 | <b>9.45×10<sup>-4</sup></b>  | -0.235 | <b>5.21×10<sup>-4</sup></b>  | -0.021 | 7.70×10 <sup>-1</sup>        |
| Treg              | <i>FOXP3</i>  | -0.299 | <b>3.50×10<sup>-2</sup></b> | -0.164 | 1.24×10 <sup>-1</sup>        | 0.005  | 9.39×10 <sup>-1</sup>        | -0.147 | <b>4.20×10<sup>-2</sup></b>  |
|                   | <i>CCR8</i>   | 0.117  | 4.20×10 <sup>-1</sup>       | 0.343  | <b>9.27×10<sup>-4</sup></b>  | -0.047 | 4.90×10 <sup>-1</sup>        | -0.113 | 1.20×10 <sup>-1</sup>        |
|                   | <i>STAT5B</i> | -0.112 | 4.38×10 <sup>-1</sup>       | 0.620  | <b>7.18×10<sup>-11</sup></b> | 0.199  | <b>3.39×10<sup>-3</sup></b>  | 0.259  | <b>2.78×10<sup>-4</sup></b>  |
|                   | <i>TGFB1</i>  | 0.107  | 4.59×10 <sup>-1</sup>       | 0.855  | <b>6.98×10<sup>-27</sup></b> | -0.019 | 7.81×10 <sup>-1</sup>        | 0.445  | <b>1.01×10<sup>-10</sup></b> |
| Exhausted T cells | <i>PDCD1</i>  | 0.211  | 1.41×10 <sup>-1</sup>       | -0.040 | 7.11×10 <sup>-1</sup>        | -0.107 | 1.18×10 <sup>-1</sup>        | -0.064 | 3.77×10 <sup>-1</sup>        |
|                   | <i>CTLA4</i>  | -0.149 | 3.02×10 <sup>-1</sup>       | 0.509  | <b>3.02×10<sup>-7</sup></b>  | -0.176 | <b>9.68×10<sup>-3</sup></b>  | -0.012 | 8.69×10 <sup>-1</sup>        |
|                   | <i>LAG3</i>   | -0.152 | 2.92×10 <sup>-1</sup>       | -0.403 | <b>8.17×10<sup>-5</sup></b>  | -0.178 | <b>9.02×10<sup>-3</sup></b>  | -0.025 | 7.31×10 <sup>-1</sup>        |
|                   | <i>HAVCR2</i> | 0.253  | 7.60×10 <sup>-2</sup>       | 0.664  | <b>9.43×10<sup>-13</sup></b> | 0.194  | <b>4.46×10<sup>-3</sup></b>  | 0.232  | <b>1.21×10<sup>-3</sup></b>  |

Bold values indicate the statistical significance at  $p < 0.05$ .
